# Supplementary material
Source: Elsevier journal article supplement (https://www.sciencedirect.com/science/article/pii/S0212656718304141)
Supplement: mmc1 [file S0212656718304141:mmc1.docx]

**Tabla I. Aceptabilidad de la EC-PC por enfermedad crónica**

|  | **N perdidos** | **Media** | **Mediana** | **Desviación estándar** | **Rango observado** | **Efecto suelo-techo (%)** | |
| --- | --- | --- | --- | --- | --- | --- | --- |
| **Suelo** | **Techo** |
| **EC-DM2** | **0** | **68,19** | **64,50** | **13,95** | **45-99** | **6,3** | **6,3** |
| Dominio 1. Aceptación | 0 | 10,75 | 12,00 | 3,89 | 4-16 | 12,5 | 12,5 |
| Dominio 2.Afrontamiento | 0 | 19,06 | 18,00 | 5,09 | 7-27 | 6,3 | 12,5 |
| Dominio 3. Automanejo | 0 | 9,63 | 8,50 | 3,75 | 4-16 | 6,3 | 12,5 |
| Dominio 4. Integración | 0 | 14,94 | 15,00 | 3,29 | 7-20 | 6,3 | 6,3 |
| Dominio 5. Adaptación | 0 | 13,81 | 13,50 | 4,07 | 7-22 | 6,3 | 12,5 |
| **EC-ICC** | **0** | **64,44** | **63,00** | **13,86** | **46-94** | **6,3** | **6,3** |
| Dominio 1. Aceptación | 0 | 11,25 | 10,50 | 3,75 | 4-16 | 6,3 | 18,8 |
| Dominio 2.Afrontamiento | 0 | 18,56 | 18,50 | 5,70 | 8-28 | 6,3 | 12,5 |
| Dominio 3. Automanejo | 0 | 9,19 | 9,00 | 2,97 | 3-15 | 6,3 | 6,3 |
| Dominio 4. Integración | 0 | 13,94 | 14,00 | 3,73 | 6-20 | 6,3 | 12,5 |
| Dominio 5. Adaptación | 0 | 11,50 | 11,00 | 3,79 | 5-18 | 6,3 | 12,5 |
| **EC-EPOC** | **0** | **55,81** | **52,00** | **20,45** | **26-86** | **6,3** | **12,5** |
| Dominio 1. Aceptación | 0 | 9,75 | 10,00 | 3,85 | 4-16 | 6,3 | 6,3 |
| Dominio 2.Afrontamiento | 0 | 15,63 | 15,50 | 6,57 | 4-26 | 12,5 | 12,5 |
| Dominio 3. Automanejo | 0 | 6,69 | 7,00 | 2,91 | 3-13 | 25,0 | 6,3 |
| Dominio 4. Integración | 0 | 12,63 | 13,00 | 4,93 | 4-19 | 6,3 | 12,5 |
| Dominio 5. Adaptación | 0 | 11,13 | 10,00 | 6,27 | 2-21 | 6,3 | 6,3 |
| **EC-Artrosis** | **1** | **69,33** | **68,00** | **11,20** | **49-89** | **6,7** | **6,7** |
| Dominio 1. Aceptación | 0 | 11,25 | 11,50 | 2,72 | 4-15 | 6,3 | 6,3 |
| Dominio 2.Afrontamiento | 0 | 19,25 | 18,00 | 3,87 | 13-26 | 12,5 | 6,3 |
| Dominio 3. Automanejo | 0 | 9,44 | 9,50 | 3,55 | 4-16 | 6,3 | 12,5 |
| Dominio 4. Integración | 0 | 16,44 | 16,50 | 2,55 | 13-20 | 25,0 | 12,5 |
| Dominio 5. Adaptación | 1 | 12,80 | 12,00 | 5,41 | 4-21 | 6,7 | 6,7 |

EC-DM2: Escala Convivencia con diabetes mellitus tipo 2; EC-ICC: Escala Convivencia con insuficiencia cardiaca crónica; EC-EPOC: Escala Convivencia con enfermedad pulmonar obstructiva crónica. EC-Artrosis: Escala Convivencia con artrosis.

**Tabla II. Consistencia interna de la EC-PC por enfermedad crónica**

|  | **Alfa de Cronbach** | **Coeficiente homogeneidad** | **Correlación**  **ítem-total corregida (rango)** |
| --- | --- | --- | --- |
| **EC-DM2** |  | |  |
| Dominio 1. Aceptación | 0,74 | 0,47 | 0,31 – 0,71 |
| Dominio 2. Afrontamiento | 0,74 | 0,31 | 0,25 – 0,62 |
| Dominio 3. Automanejo | 0,72 | 0,46 | 0,29 – 0,81 |
| Dominio 4. Integración | 0,72 | 0,35 | 0,23 – 0,76 |
| Dominio 5. Adaptación | 0,66 | 0,27 | -0,07 – 0,70 |
| **EC-ICC** |  | | |
| Dominio 1. Aceptación | 0,80 | 0,48 | 0,16 – 0,84 |
| Dominio 2. Afrontamiento | 0,78 | 0,38 | 0,33 – 0,70 |
| Dominio 3. Automanejo | 0,45 | 0,09 | 0,06 – 0,54 |
| Dominio 4. Integración | 0,67 | 0,35 | -0,18 – 0,72 |
| Dominio 5. Adaptación | 0,47 | 0,15 | -0,21 – 0,52 |
| **EC-EPOC** |  | | |
| Dominio 1. Aceptación | 0,79 | 0,53 | 0,51 – 0,81 |
| Dominio 2. Afrontamiento | 0,85 | 0,46 | 0,44 – 0,79 |
| Dominio 3. Automanejo | 0,52 | 0,19 | 0,05 – 0,56 |
| Dominio 4. Integración | 0,89 | 0,65 | 0,52 – 0,92 |
| Dominio 5. Adaptación | 0,89 | 0,58 | 0,63 – 0,84 |
| **EC-Artrosis** |  | | |
| Dominio 1. Aceptación | 0,48 | 0,05 | -0,07 – 0,58 |
| Dominio 2. Afrontamiento | 0,42 | 0,14 | -0,04 – 0,53 |
| Dominio 3. Automanejo | 0,63 | 0,41 | 0,27 – 0,56 |
| Dominio 4. Integración | 0,30 | 0,17 | -0,11 – 0,48 |
| Dominio 5. Adaptación | 0,68 | 0,26 | 0,17 – 0,78 |

EC-DM2: Escala Convivencia con diabetes mellitus tipo 2; EC-ICC: Escala Convivencia con insuficiencia cardiaca crónica; EC-EPOC: Escala Convivencia con enfermedad pulmonar obstructiva crónica. EC-Artrosis: Escala Convivencia con artrosis.
